# Supplementary material for: Efficient hydrogenation performance improvement of MoP and Ni2P catalysts by adjusting the electron distribution around Mo and Ni atoms
Source: Royal Society of Chemistry journal article supplement (doi:10.1039/c6ra09862b), 2016-01-01
Supplement: c6ra09862b1.pdf [file c6ra09862b1.pdf]

## Supplementary Information

### The hydrogenation performance control of MoP and Ni<sub>2</sub>P catalysts by electronegativity modification method

Mingyue Lu,<sup>a</sup> Lirong Zheng,<sup>c</sup> Rongguan Li,<sup>a</sup> Qingxin Guan<sup>a</sup> and Wei Li<sup>a, b\*</sup>

<sup>a</sup> College of Chemistry, Key Laboratory of Advanced Energy Materials Chemistry  
(Ministry of Education),

<sup>b</sup> Collaborative Innovation Center of Chemical Science and Engineering (Tianjin),  
Nankai University, Tianjin, 300071, China

<sup>c</sup> Institute of High Energy Physics, the Chinese Academy of Sciences, Beijing  
100049, China.

---

\*Corresponding Author. Tel: +86-22-23508662.  
fax: +86-22-23508662.  
weili@nankai.edu.cn (W. Li).

**Table S1.** The element content of different catalysts measured by SEM-EDS.

| Samples                                        | Mo [wt%] | Ni [wt%] | P [wt%] | W [wt%] | Cu [wt%] |
|------------------------------------------------|----------|----------|---------|---------|----------|
| MoP                                            | 75.36    | -        | 24.64   | -       | -        |
| Mo <sub>8</sub> WP <sub>9</sub>                | 60.81    | -        | 19.73   | 19.46   | -        |
| Mo <sub>8</sub> CuP <sub>9</sub>               | 70.08    | -        | 22.28   | -       | 7.64     |
| Ni <sub>2</sub> P                              | -        | 87.21    | 12.79   | -       | -        |
| Ni <sub>38</sub> W <sub>2</sub> P <sub>2</sub> | -        | 66.08    | 19.99   | 14.29   | -        |

**Table S2.** Results of EXAFS model fitting of different catalysts<sup>a</sup>.

| Samples                                         | Element | Shell | R (Å) | CN  | ss <sup>2</sup> /10 <sup>3</sup> | s <sub>0</sub> <sup>2</sup> | E <sub>0</sub> /eV | R- factor(%) |
|-------------------------------------------------|---------|-------|-------|-----|----------------------------------|-----------------------------|--------------------|--------------|
| MoP                                             | Mo      | Mo-P  | 2.45  | 5.7 | 3.73                             | 0.93                        | 0.3                | 0.22         |
|                                                 |         | Mo-Mo | 3.21  | 6.8 | 3.95                             | 0.79                        | -0.7               | 0.22         |
| Mo <sub>8</sub> WP <sub>9</sub>                 | Mo      | Mo-P  | 2.46  | 5.9 | 3.72                             | 0.91                        | 1.5                | 0.51         |
|                                                 |         | Mo-Mo | 3.21  | 7.3 | 4.56                             | 0.72                        | -0.7               | 0.51         |
|                                                 | W       | W-P   | 2.45  | 5.5 | 2.94                             | 0.81                        | 7.5                | 0.89         |
|                                                 |         | W-M   | 3.21  | 5.3 | 4.78                             | 0.44                        | 5.8                | 0.89         |
| Ni <sub>2</sub> P                               | Ni      | Ni-P  | 2.24  | 2.4 | 9.09                             | 0.53                        | 0.7                | 0.37         |
|                                                 |         | Ni-Ni | 2.62  | 4.3 | 7.53                             | 0.54                        | 3.5                | 0.37         |
| Ni <sub>38</sub> W <sub>2</sub> P <sub>20</sub> | Ni      | Ni-P  | 2.24  | 4.1 | 8.94                             | 0.54                        | 0.8                | 0.32         |
|                                                 |         | Ni-Ni | 2.62  | 8.1 | 7.96                             | 0.55                        | 3.8                | 0.32         |
|                                                 | W       | W-P   | 2.46  | 4.6 | 8.61                             | 1.15                        | 5.7                | 0.19         |
|                                                 |         | W-Ni  | 2.72  | 3.7 | 5.32                             | 0.46                        | 3.2                | 0.19         |

<sup>a</sup>R: Interatomic distance; CN: Coordination number; ss<sup>2</sup>: Disorder factor. The errors in the fitted parameters are estimated to be within CN ± 10 %, R ± 0.02-0.05

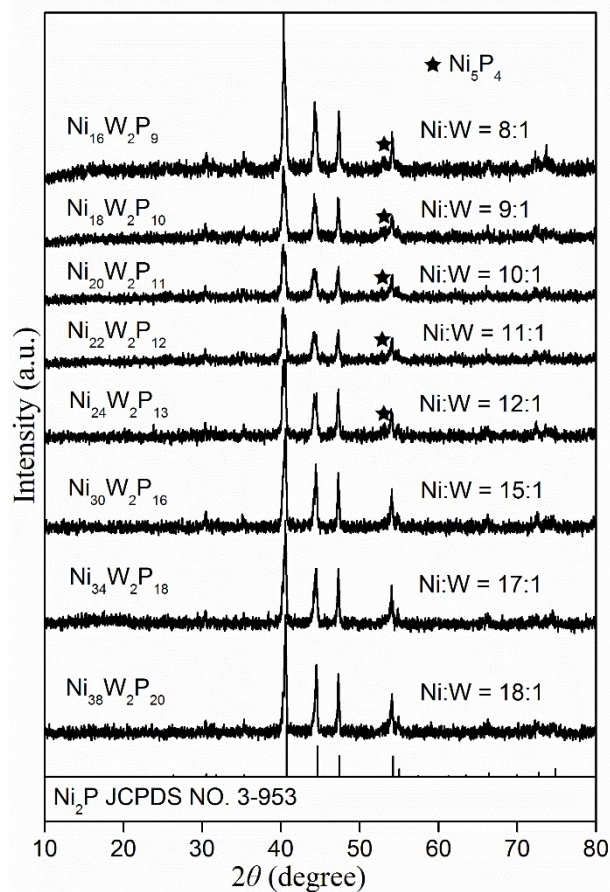

**Figure S1.** The XRD patterns of Ni-W-P catalysts with different Ni/W ratio.

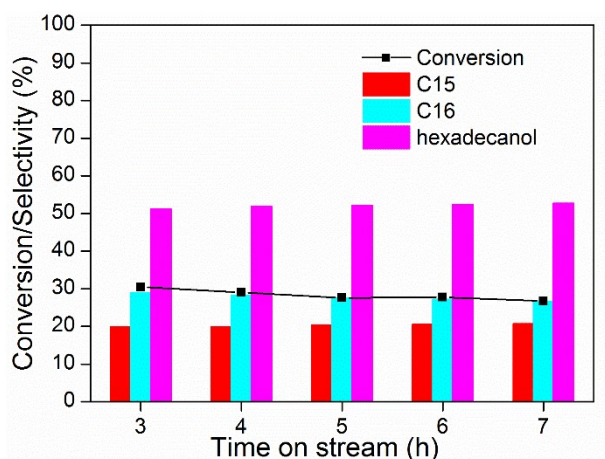

**Figure S2.** The methyl palmitate conversion and products selectivity of MoP catalysts (reaction conditions: 3 MPa, 300 °C, WHSV = 6 h<sup>-1</sup>, H<sub>2</sub>/oil = 1000).

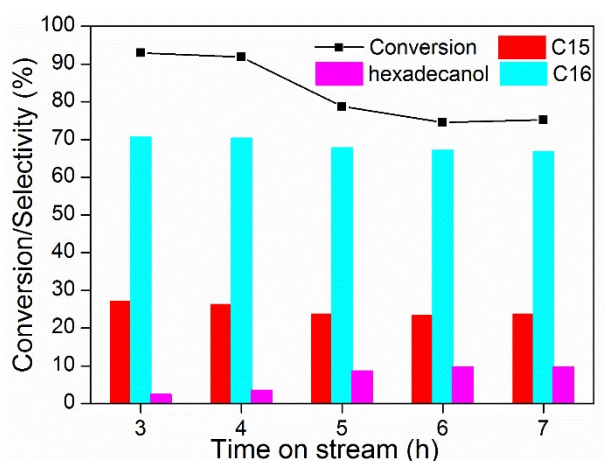

**Figure S3.** The methyl palmitate conversion and products selectivity of Mo<sub>8</sub>WP<sub>9</sub> catalysts (reaction conditions: 3 MPa, 300 °C, WHSV = 6 h<sup>-1</sup>, H<sub>2</sub>/oil = 1000).

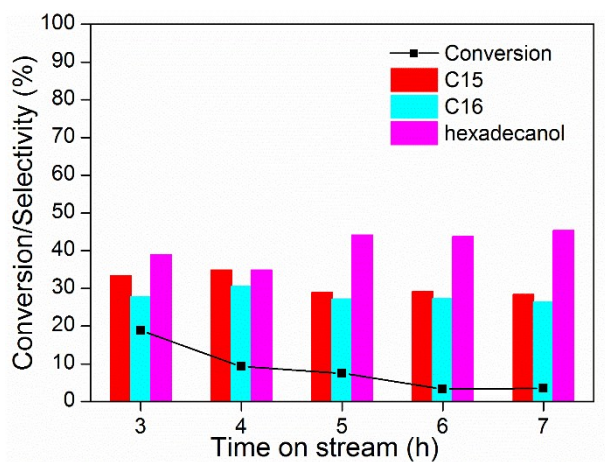

**Figure S4.** The methyl palmitate conversion and products selectivity of Mo<sub>8</sub>CuP<sub>9</sub> catalysts (reaction conditions: 3 MPa, 300 °C, WHSV = 6 h<sup>-1</sup>, H<sub>2</sub>/oil = 1000).

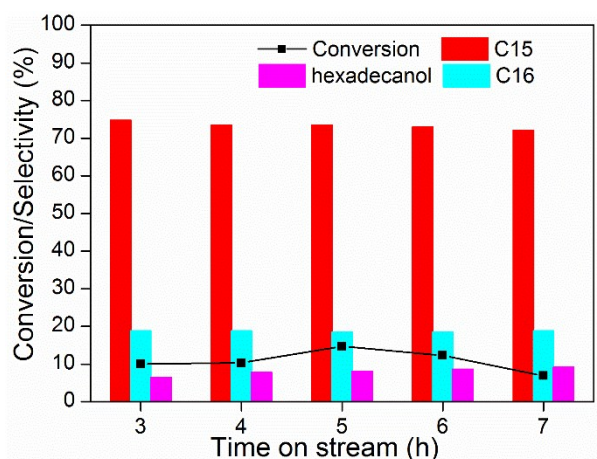

**Figure S5.** The methyl palmitate conversion and products selectivity of Ni<sub>2</sub>P catalysts

(reaction conditions: 3 MPa, 370 °C, WHSV = 3 h<sup>-1</sup>, H<sub>2</sub>/oil = 1000).

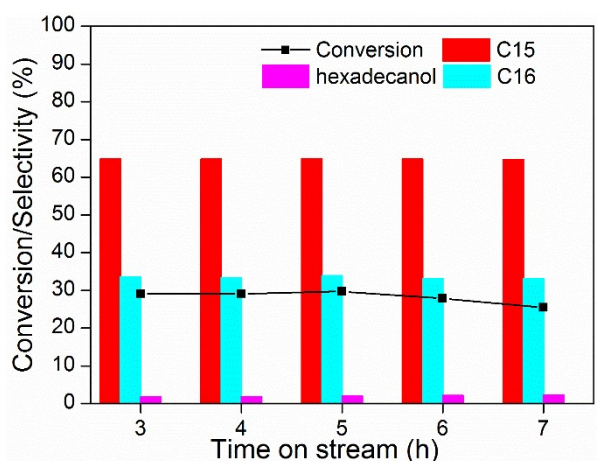

**Figure S6.** The methyl palmitate conversion and products selectivity of Ni<sub>2</sub>P catalysts

(reaction conditions: 3 MPa, 370 °C, WHSV = 3 h<sup>-1</sup>, H<sub>2</sub>/oil = 1000).
